# Supplementary material
Source: PubMed Central journal article supplement (PMC3172102)
Supplement: cdd201164x1.pdf [file cdd201164x1.pdf]

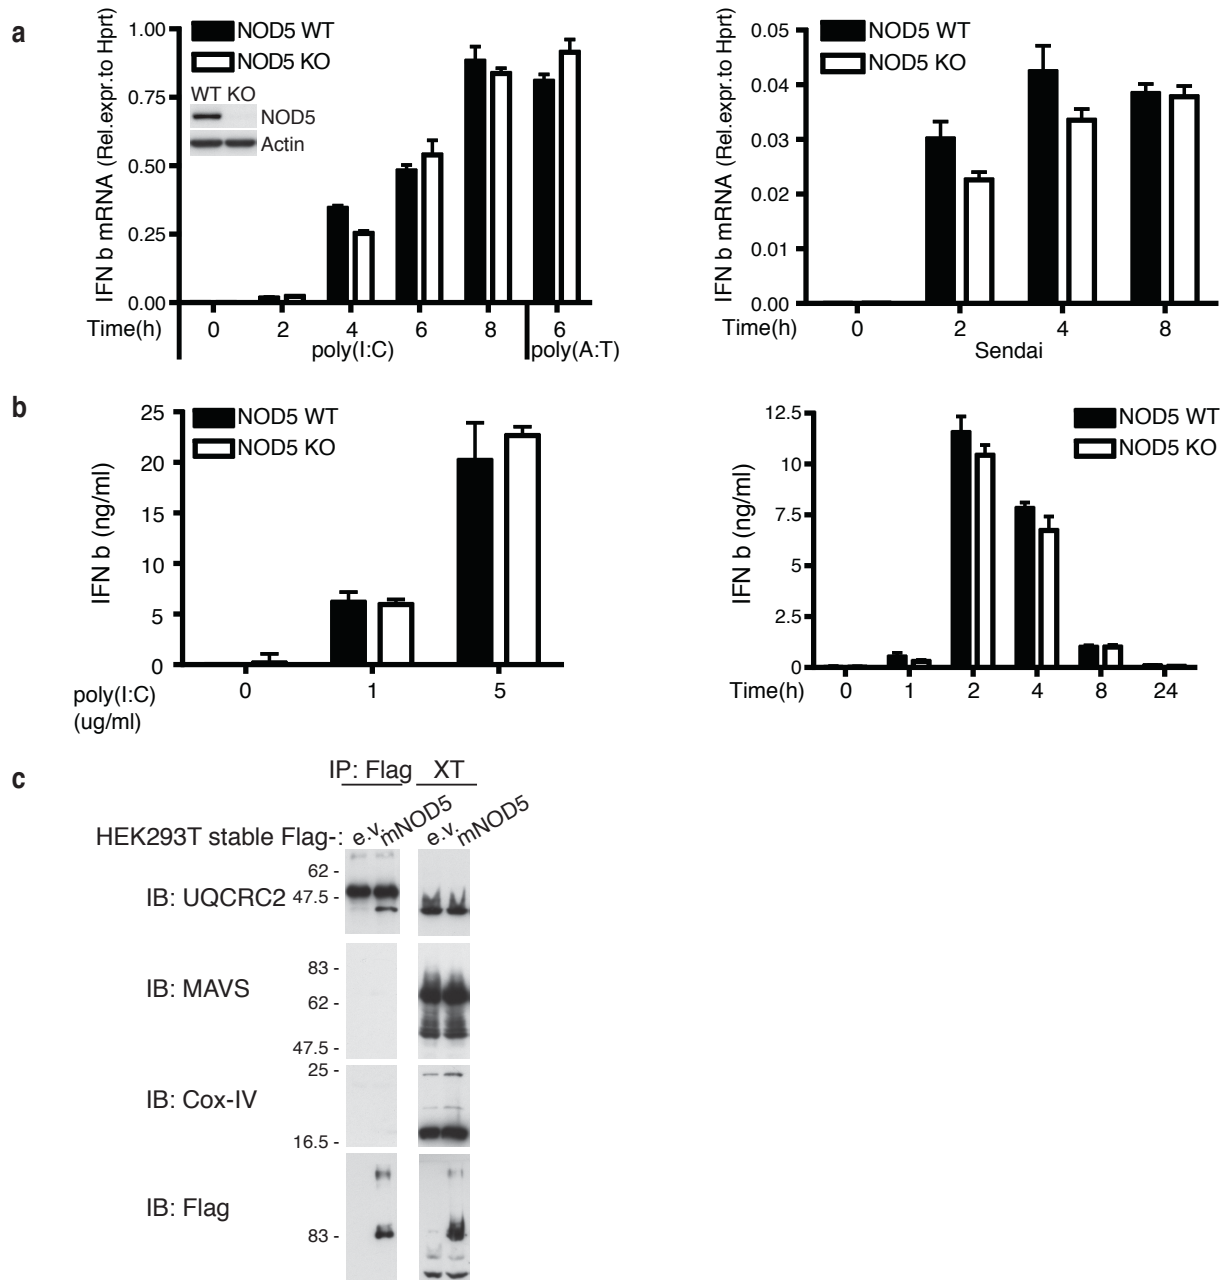

**Supplementary Figure 1 - NOD5-deficiency does not affect RLR responses**

(a) Primary WT and KO NOD5 MEFs (left) or BMDMs (right) were stimulated with 1  $\mu$ g/ml of poly(I:C) or poly(dA:dT) complexed with Lipofectamine (left) or infected with Sendai virus (strain Z, 20 MOI) (right) for the indicated time. IFN- $\beta$  mRNA induction was analysed by quantitative PCR. (Insert left) Primary WT and KO NOD5 MEFs cell extracts were analyzed by immunoblot using the indicated antibodies (b) (Left) Primary WT and KO NOD5 MEFs were stimulated with the indicated dose of poly(I:C) complexed with Lipofectamine for 24 hours. IFN- $\beta$  production was assessed by ELISA. Indicated values are means  $\pm$ SD of triplicate wells. (Right) WT and NOD5 KO mice (n=3) were injected intravenously with 200  $\mu$ g of poly(I:C), sera were collected at indicated times and concentration of IFN- $\beta$  was measured by ELISA. The error bars indicate SEM. (c) HEK293T cells stably transduced with an empty MSCV vector (EV) or C-terminally FLAG-tagged mouse NOD5 were lysed and immunoprecipitates (IP) and cell extracts (XT) were analyzed by immunoblot using the indicated antibodies. Results are representative of at least two independent experiments.
