# Supplementary material
Source: PubMed Central journal article supplement (PMC3172102)
Supplement: cdd201164x2.pdf [file cdd201164x2.pdf]

## EXPRESSION VECTORS

Full-length mouse NOD5 cDNA was amplified from expressed sequence tag clone (IMAGE clone ID: 30012053) by standard PCR with Pwo Superyield polymerase (Roche). PCR products were cloned into a derivative of pCR3 (Invitrogen), in frame with a C-terminal Flag tag. Retroviral pMSCV plasmid expressing NOD5 was generated by subcloning from pCR3. Packaging plasmids for pMSCV, pCG (encoding VSV G envelope glycoprotein) and pHit60 (encoding gag and pol retroviral genes), were kind gifts of C.A. Benedict (San Diego, USA).

## MICE

NOD5-deficient mice were generated by Ingenius, New York. NOD5 mice were on a mix background C57BL/6-129/SvJ: all experiments were therefore performed with NOD5 WT and KO littermate mice obtained from crossing of NOD5 +/- mice. All animal procedures were conducted in compliance with Swiss federal legislation for animal experimentation.

## CELLS AND CULTURE CONDITIONS

The human embryonic kidney (HEK) 293T were grown in Dulbecco's modified Eagle's medium (DMEM, Invitrogen) supplemented with 10% heat inactivated FCS. Wild-type and knockout mouse embryonic fibroblasts (MEFs) were generated from E14 embryos in accordance with standard procedures. MEFs were grown in DMEM supplemented with 10% heat inactivated FCS and 100  $\mu$ M  $\beta$ -mercaptoethanol (Invitrogen). Primary MEF were used until passage 6. Primary bone marrow cells were differentiated by culture for 6 days in DMEM supplemented with 50 U/mL penicillin, 50  $\mu$ g/mL streptomycin (Invitrogen), 10% (vol/vol) fetal calf serum (PAA) and 20% (vol/vol) supernatant from L929 cells that contains the macrophage growth and differentiation factor, CSF-1.

## ANTIBODIES

Antibodies used for immunoblot analysis were: NLRX1/NOD5 (17215-1-AP, Proteintech), Flag (Sigma), MAVS (ALX-804-847, Alexis), CoxIV (4844, Cell Signaling), caspase-3 (C31720, Transduction Lab), UQCRC2 (13G12AF12BB11, Mitosciences) and beta actin (ab8227, Abcam). Secondary peroxidase-conjugated antibodies were from Jackson ImmunoResearch.

## ELISA

Cell culture supernatants were assayed for mouse IFN- $\beta$  (PBL Interferon Source) according to manufacturer's instructions.

## QUANTITATIVE PCR

Cellular RNA was extracted using RNeasy kits (Qiagen). Contaminating genomic DNA was removed using RNase-Free DNase (Qiagen), and cDNA was synthesized using M-MLV RT, RNase H(-) point mutant (Promega) and Random Primers (Invitrogen). Gene expression was quantified using the LightCycler® 480 SYBR Green I Master (Roche Diagnostics) on a LightCycler® 480 machine (Roche Diagnostics). Standard cycling was used (45 cycles of 95°C-, 60°C- and 72°C-steps of 10 seconds each). Expression was determined relative to the abundance of the housekeeping gene hypoxanthine guanine phosphoribosyl-transferase (Hprt). Data were analyzed and SD calculated using the LightCycler® 480 software release 1.5.0 SP3. Primers used were as follows (5'-3'): Hprt F: GCAGTACAGCCCCAAAATGG; Hprt R:

AACAAAGTCTGGCCTGTATCCAA; Ifn $\beta$  F: GGAGATGACGGAGAAGATGC Ifn $\beta$  R: CCCAGTGCTGGAGAAATTGT

#### IN VITRO STIMULATION EXPERIMENTS

Primary MEFs were stimulated with the indicated doses of poly(I:C) (tlrl-pic, Invivogen) or poly(dA:dT) poly(dT:dA) (Sigma) after complex formation with Lipofectamine 2000 (Invitrogen) (ratio of 1  $\mu$ l Lipofectamine to 1  $\mu$ g nucleotides) according to manufacturer's instructions. For Sendai infection, BMDMs were incubated with virus (strain Z, 20 MOIs) for 1 hr in serum-free medium before replacement with the complete media containing 10% FCS.

#### IN VIVO STIMULATION EXPERIMENTS

Mice were injected intravenously with 200  $\mu$ g/body of poly(I:C) (tlrl-pic, Invivogen). Sera was collected at the indicated times for ELISA measurements.

#### STABLE GENE EXPRESSION

For generation of stable cell populations of HEK293T cells expressing NOD5, HEK293T cells in 10 cm dishes were transfected with a mixture containing pMSCV NOD5 construct or pMSCV empty vector, in combination with pCG and pHIT60 packaging plasmids. 8 h after transfection the cells were washed and cultured O/N in the presence of 10 mM Na-butyrate (Sigma). 24 h post-transfection Na-butyrate was removed from the cells, which were cultured for another day. 48 h post-transfection cell supernatants were harvested, filtered and used for O/N infections of HEK293T cells, in the presence of 6 mg/ml polybrene (Sigma). 48 h post-infection 2.5 mg/ml puromycin (Sigma) was added onto the media for selection.

#### IMMUNOPRECIPITATION

mNOD5-stably expressing HEK293T cells were resuspended in Nonidet P (NP)-40 lysis buffer (1 % NP-40, 50 mM Hepes pH 7.4, 250 mM NaCl, 5 mM EDTA, 10 mM NaF, 20 mM b-glycerophosphate, 1 mM NaVO<sub>4</sub>, complete protease inhibitor cocktail (Roche)) for 15 min on ice, and lysis was completed by three cycles of freeze and thaw. Lysates were incubated for 1 h at 4°C with 20 ml sepharose6B (Sigma) on a rotating wheel for a pre-clearing step. After centrifugation, 1/10 supernatant (SN) was frozen (loaded as a cell extract control) and 9/10 SN was incubated overnight at 4 C on a rotating wheel with anti-Flag (M2) beads (Sigma). Beads were recovered and washed four times with lysis buffer before analysis by SDS-PAGE and immunoblotting.

#### PROTEOMIC ANALYSIS

The proteomic screen and the identification of NOD5 interaction partners were performed by the Protein Analysis Facility (PAF) of the Department of Biochemistry, University of Lausanne.
